# Supplementary material
Source: publisher figshare collection journal article supplement (https://asha.figshare.com/ndownloader/files/38952239)

**Supplemental Material S1.** Disposable oxygen atomization drive device.

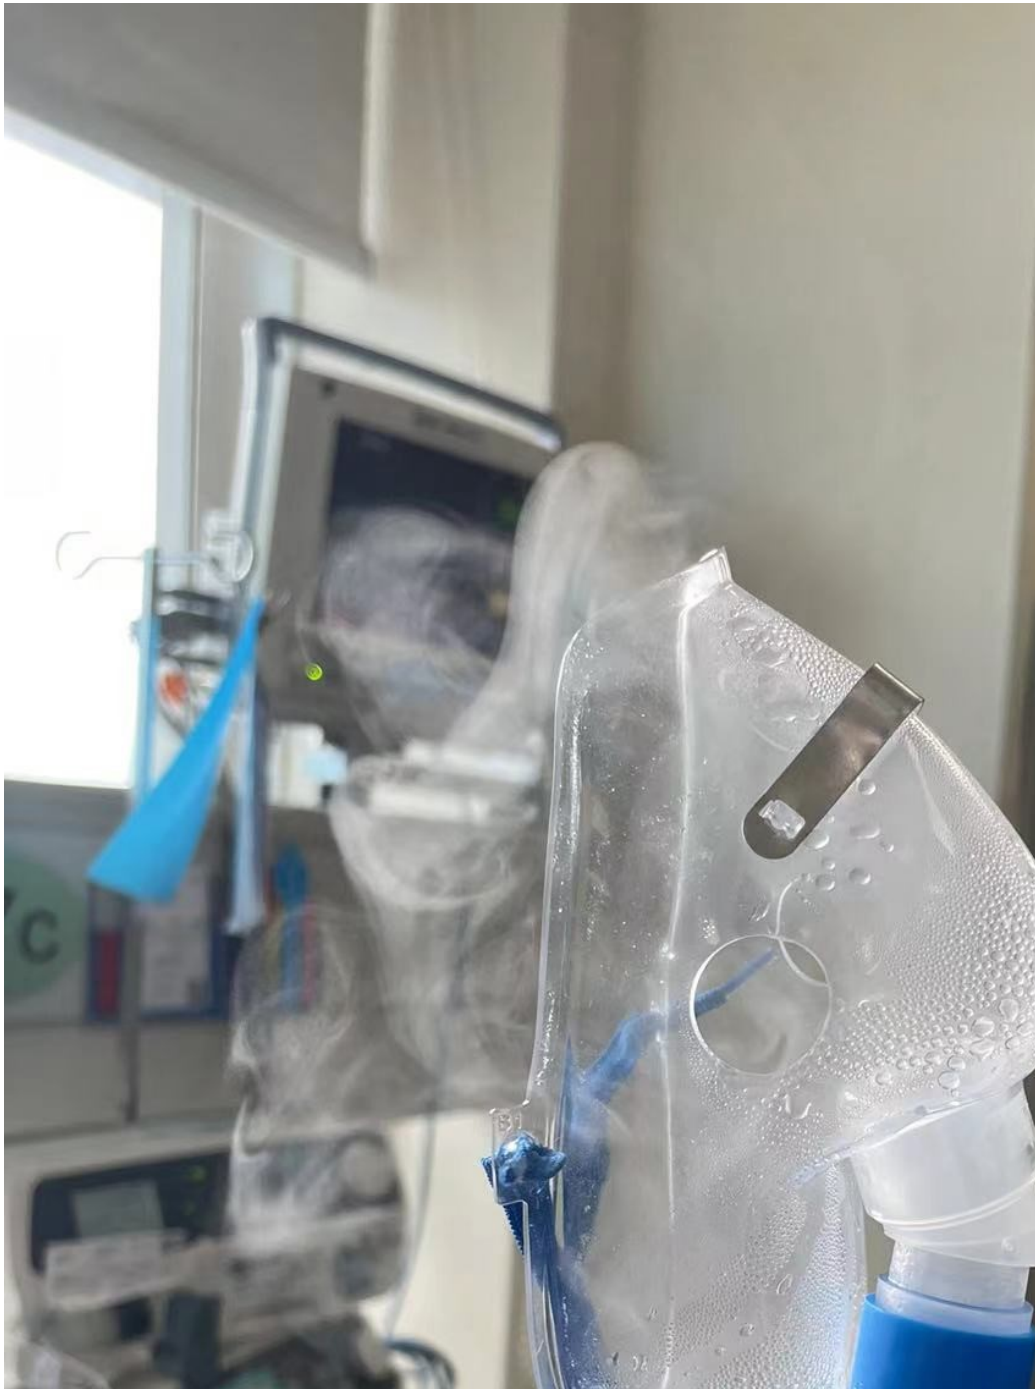

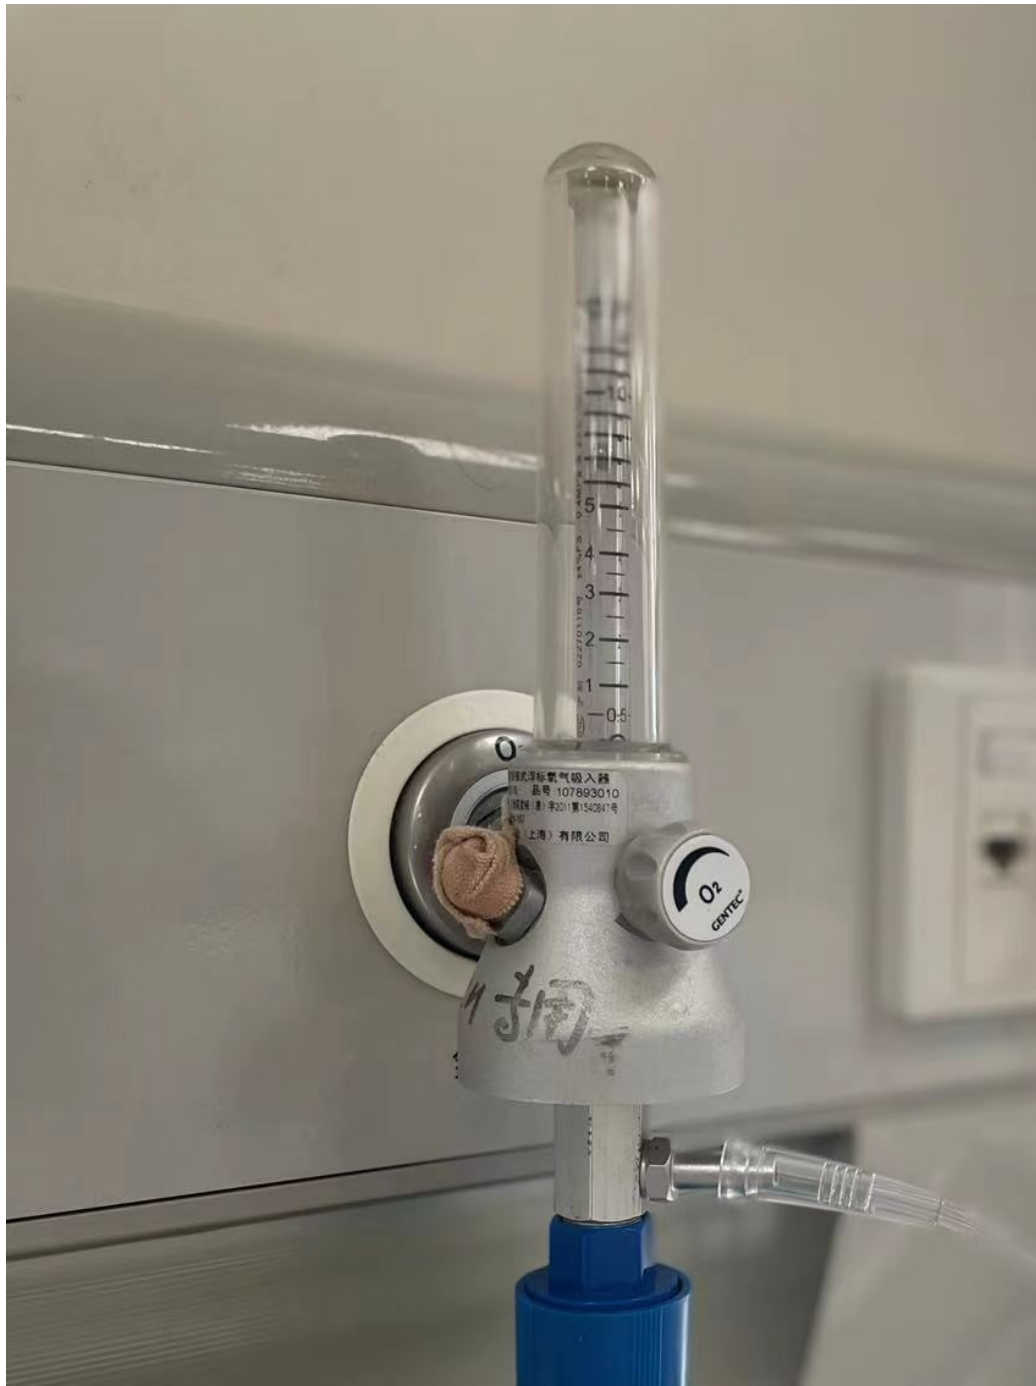

Supplement: Supplementary file 1 [file 38952239]
